# Supplementary material
Source: PubMed Central journal article supplement (PMC4578806)
Supplement: NIHMS722982-supplement-supplement_1.pdf [file NIHMS722982-supplement-supplement_1.pdf]

## Table of Contents

|                                                                               |            |
|-------------------------------------------------------------------------------|------------|
| <b>RESULTS (Product analyses)</b>                                             | page SI-2  |
| <i>CYP27A1 and 25-Hydroperoxycholesterol (1)</i>                              | page SI-2  |
| <i>25-Hydroxycholesterol (4)</i>                                              | page SI-2  |
| <i>25,27-dihydroxycholesterol (5)</i>                                         | page SI-3  |
| <i>CYP27A1 and 20<math>\zeta</math>-Hydroperoxycholesterols (2 and 3)</i>     | page SI-4  |
| <i>20<math>\alpha</math>,27-dihydroxycholesterol</i>                          | page SI-4  |
| <i>CYP11A1 and 25-Hydroperoxycholesterol (1)</i>                              | page SI-6  |
| <i>25-hydroxycholesterol (4)</i>                                              | page SI-6  |
| <i>22,25-dihydroxycholesterol (5)</i>                                         | page SI-6  |
| <i>CYP11A1 and 20<math>\alpha</math>-Hydroperoxycholesterol (2)</i>           | page SI-6  |
| <i>Pregnenolone</i>                                                           | page SI-6  |
| <i>20<math>\alpha</math>,22R-dihydroxycholesterol (7)</i>                     | page SI-9  |
| <i>CYP11A1 and 20<math>\beta</math>-hydroperoxy-20-iso-cholesterol (3)</i>    | page SI-11 |
| <i>Pregnenolone</i>                                                           | page SI-11 |
| <i>20<math>\beta</math>,21-dihydroxy-20-iso-cholesterol (8)</i>               | page SI-13 |
| <i>Spectral changes in CYP7A1 and CYP46A1</i>                                 | page SI-14 |
| <i>20<math>\zeta</math>-Hydroperoxy cholesterol (2 and 3)</i>                 | page SI-16 |
| <i>20<math>\beta</math>,21-dihydroxy-20-iso-cholesterol (8)</i>               | page SI-16 |
| <i>X-ray crystallography of 20<math>\alpha</math>,21-dihydroxycholesterol</i> | page SI-16 |

## **RESULTS (Product analyses)**

### *Spectral Changes in CYP27A1 and Product Analysis upon addition of 25-Hydroperoxycholesterol (1)*

Addition of the 25-hydroperoxide **1** to CYP27A1 gave a difference spectrum with a through shifting within 10 min from 422 to 416 nm (Figure 1).

*25-Hydroxycholesterol (4)*. Thin layer chromatography (TLC) of the MeCl<sub>2</sub> extract showed that most of **1** had been reduced to the corresponding 25-hydroxycholesterol **4** ( $R_f$  = 0.74 rel. to **1**, magenta colour response to acid/heat, identical to authentic **4**) (Scheme 1). GC-MS data of the TMS derivative were identical to authentic **4** showing a

major peak at  $t_R = 28.85$  min, and a characteristic MS fragmentation pattern:  $m/z = 546$  (M),  $m/z = 456$  (M – 25-OTMS),  $m/z = 271$  (M – [C24-27, 25OTMS + C3-5, 3OTMS]),  $m/z = 131$  (base peak) (C25-27, 25OTMS fragment).

**Figure S1.** *Top panel.* GC of extract from CYP27A1 incubation with 25-hydroperoxide **1**. Peak at 28.888 is the 25-hydroxycholesterol (**4**) and peak at 33.344 min was characterized as **5**. *Lower panel.* MS fragmentation pattern of peak at 28.888 min (25-hydroxycholesterol **4**).

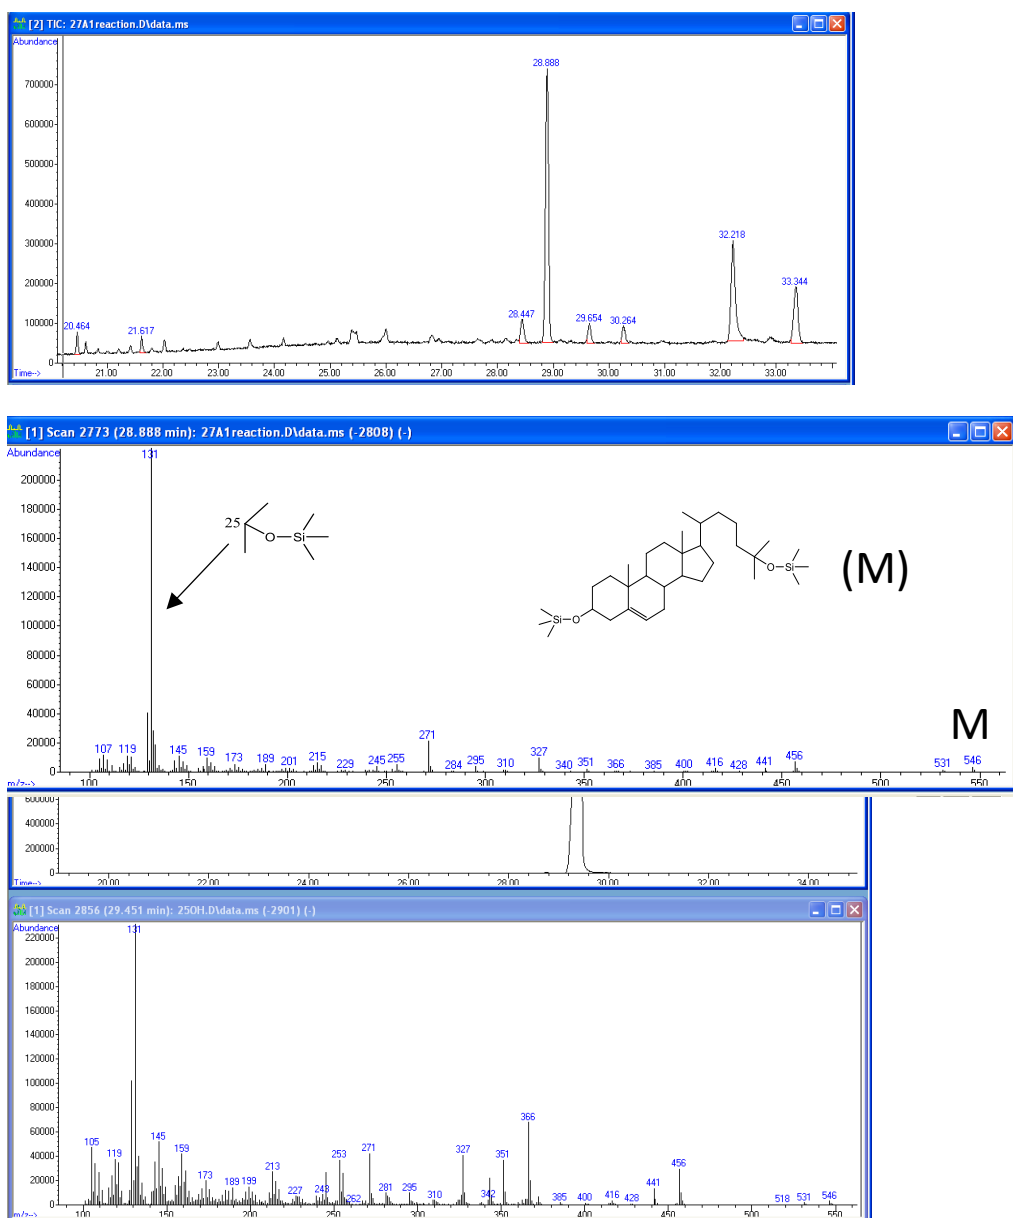

25,27-dihydroxycholesterol (**5**). A small polar spot on the TLC ( $R_f = 0.17$  rel. to **1**; brown colour to acid/heat) suggested the presence of a triol product, that correlated to a new

peak in the GC-MS profile of the TMS derivative at  $t_R = 33.35$  min (>30% yield rel. to **4**), which we assign to 25,27-dihydroxycholesterol (**5**) (Scheme 1) based on its GC-MS fragmentation pattern:  $m/z = 619$  (M-15);  $m/z = 531$  (M-27OTMS);  $m/z = 219$  (C25-27 + 25,27diOTMS side chain fragment);  $m/z = 147$  (base peak) ( $m/z = 219$  fragment, minus one TMS group).

**Scheme S1.** Structure of the TMS derivative of 25,26(27)-dihydroxycholesterol (**5**).

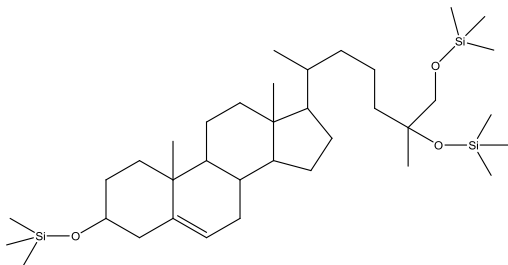

**Figure S3.** MS of peak at  $t_R = 33.35$  min characterized as 25,26(27)-dihydroxycholesterol

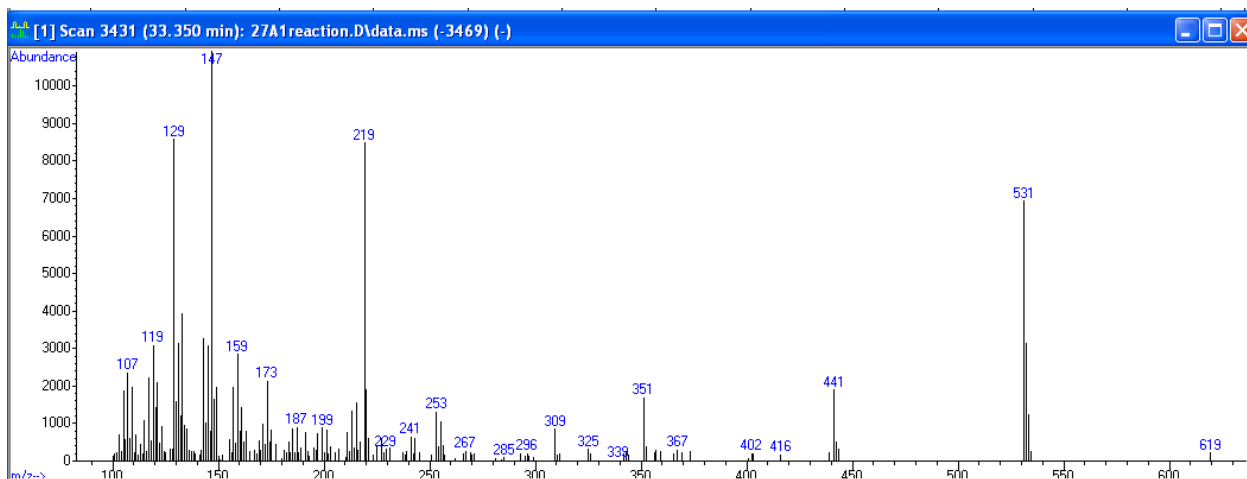

*Spectral Changes in CYP27A1 and Product Analysis upon addition of the epimeric 20 $\xi$ -Hydroperoxycholesterols (2 and 3)*

Addition of the 20 $\alpha$ -hydroperoxycholesterol (**2**) to CYP27A1 induced difference spectrum (within 10 min) with a maximum at 404 nm and a minimum at 425 nm (Figure 1), a spectral response that does not seem to correspond to any of the reported types of P450 responses. TLC analysis showed a small brown spot in the triol region ( $R_f < 0.2$  rel. to **2**), and a small peak at  $t_R = 27.436$  min ( $<10\%$ ) in the GC-MS analysis. Excess persilylated **2** and **3** decompose at the GC injection site to give pregnelone 3-TMS ( $t_R = 20.72$  min).

Addition of the 20 $\beta$ -hydroperoxy-20-*iso*-cholesterol (**3**) to CYP27A1 also induced a difference spectrum similar to that elicited by the 20 $\alpha$ -hydroperoxide **2** with a maximum at 408 nm and a minimum at 426 nm (Figure 1). However, no metabolites were detected in the MeCl<sub>2</sub> extracts as indicated by TLC and GC-MS analyses.

*20 $\alpha$ ,27-dihydroxycholesterol.* TLC analysis of the MeCl<sub>2</sub> extract of the CYP27A1 incubation with the 20 $\alpha$ -hydroperoxide **2** showed a small brown spot in the triol region ( $R_f < 0.2$  rel. to **2**), and a small peak at  $t_R = 27.436$  min ( $<10\%$ ) in the GC-MS analysis. Although the MS fragmentation pattern of this compound is consistent with 20 $\alpha$ ,27-dihydroxycholesterol, the 27-position of the second side chain hydroxyl is difficult to ascertain from the fragmentation pattern:  $m/z$  461 (loss of C22-27 + OTMS side chain fragment); 201 (base peak) (C20-27 + OTMS side chain fragment).

**Scheme S2.** Proposed MS fragments of GC peak at  $t_R = 27.436$  min, assigned to 20 $\alpha$ ,27-dihydroxycholesterol.

Chemical Formula:  $C_{35}H_{67}O_3Si_3^+$   
Exact Mass: 619.44; Molecular Weight: 620.16

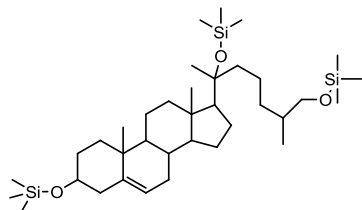

Chemical Formula:  $C_{27}H_{50}O_2Si_2$   
Exact Mass: 462.33

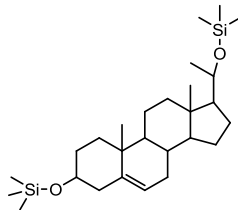

Chemical Formula:  $C_{14}H_{34}O_2Si_2$   
Exact Mass: 290.21

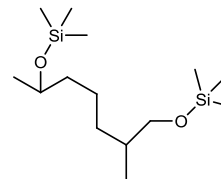

Chemical Formula:  $C_9H_{20}OSi$   
Exact Mass: 172.13

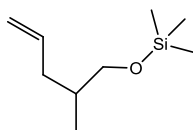

Chemical Formula:  $C_{11}H_{24}OSi$   
Exact Mass: 200.16

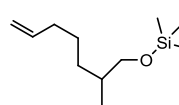

**Figure S4.** MS fragmentation of peak  $t_R = 27.436$  min assigned as 20 $\alpha$ ,27-dihydroxycholesterol.

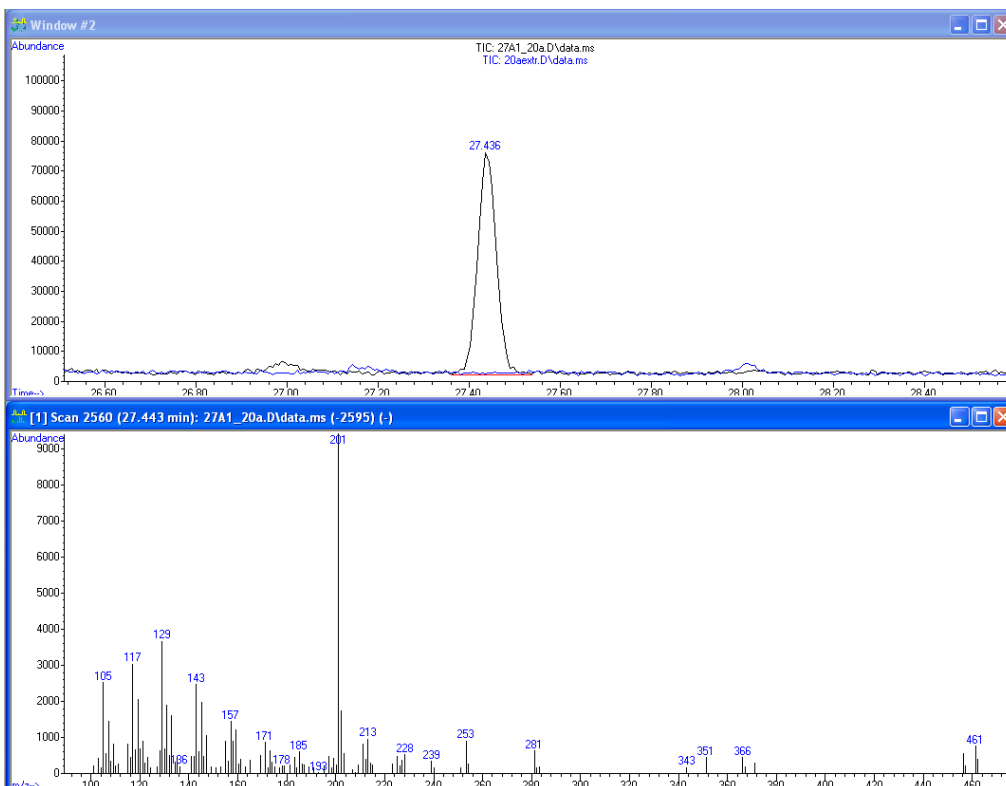

### *Spectral Changes in CYP11A1 and Product Analysis upon addition of 25-Hydroperoxycholesterol (1)*

Addition of the 25-hydroperoxide **1** to CYP11A1 gave a difference spectrum that developed within 10 min in a stable spectrum with a maximum at 386 nm and a minimum at 419 nm (Figure 1). This type of a response is indicative of water displacement from the coordination sphere of the haem iron and is usually elicited by P450 substrates.

**25-hydroxycholesterol (4).** Analysis of the MeCl<sub>2</sub> extract as described above showed that most of **1** had been reduced to 25-hydroxycholesterol (**4**) (Scheme 1), which was in all respects identical to authentic **4** (TLC, R<sub>f</sub> = 0.74 rel. to **1**, magenta colour response to acid/heat; GC-MS of TMS derivative, t<sub>R</sub> = 28.85 min, and identical MS fractionation as compared to authentic **2**, see above).

**22,25-dihydroxycholesterol (5).** TLC of the MeCl<sub>2</sub> extract revealed a small polar spot (R<sub>f</sub> = 0.15 rel. to **1**; brown colour to acid/heat) while GC-MS analysis of the TMS derivatives confirmed the presence of a new product at t<sub>R</sub> = 29.688 (yield <30% rel. to **2**), to which we assign the 22,25-dihydroxycholesterol (**5**) structure (Scheme 1) based on the following characteristic MS ion fragments: m/z = 619 (M-15); m/z = 475 (M - 159, cleavage of the C22-23 bond); m/z = 261 (side chain fragment upon cleavage of the C20-22 bond), m/z = 171 (base peak) (261 minus 22OTMS); m/z = 159 (C23-27, 25OTMS fragment formed upon cleavage of the C22-23 bond); m/z = 131 (C25-27, 25OTMS fragment formed upon cleavage of the C24-25 bond).

**Scheme S3.** Proposed fragments observed in the MS fragmentation pattern of peak at t<sub>R</sub> = 29.688 min characterized as 22,25-dihydroxycholesterol (**5**).

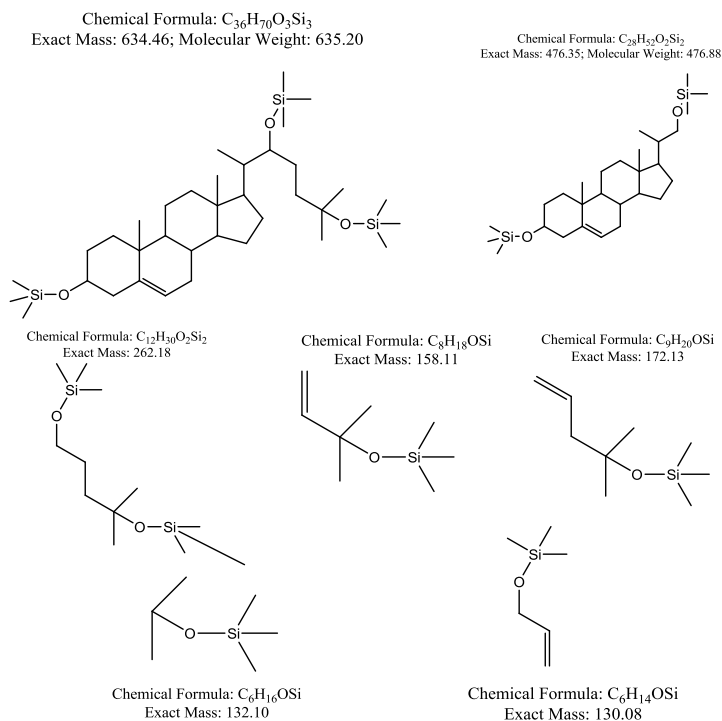

**Figure S5.** GC-MS analysis of the TMS-derivatives from the incubation of CYP11A1 with **1**. *Top panel:* Red trace: Incubation of **1** without CYP11A1; blue trace: Incubation of CYP11A1 alone; black trace: incubation of CYP11A1 with **1**. *Lower panel:* MS of peak at 29.668 min (22,25-dihydroxycholesterol **5**).

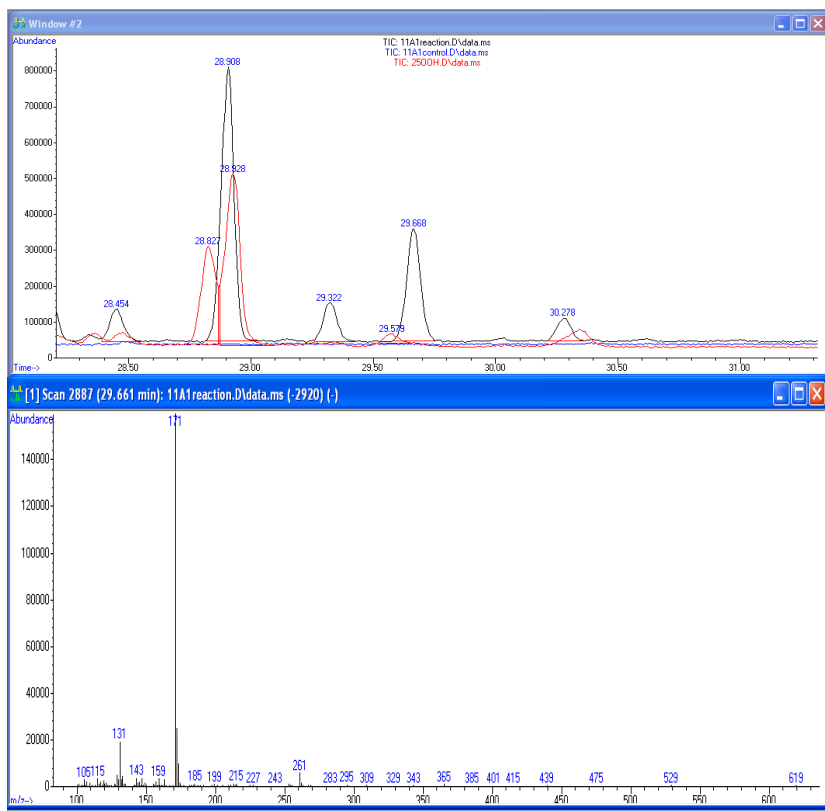

### *Spectral changes in CYP11A1 and Product Analysis upon addition of the 20 $\alpha$ -Hydroperoxycholesterol (2)*

Addition of the 20 $\alpha$ -hydroperoxycholesterol (**2**) to CYP11A1 induced within 1 min a classical type 1 difference spectrum with a maximum at 387 nm and a minimum at 419 nm. The isomeric 20 $\beta$ -hydroperoxy-20-*iso*-cholesterol (**3**) gave a similar type of response; except the maximum was shifted to 403 nm and minimum to 423 nm and it took a longer time (~10 min) for the spectrum to develop (Figure 1).

**Pregnenolone.** Persilylated 20 $\xi$ -hydroperoxycholesterols **2** and **3** both decompose upon injection in the flash heater zone of the GC to give the TMS derivative of pregnenolone as a single product ( $t_R$  = 20.8 min; MS =  $m/z$  388 (M), 373, 332, 298 (M minus 3-OTMS), 283, 259 and 129 (base peak, fragment C2-4 + 3-OTMS).

**Figure S7.** MS of authentic 3-TMS pregnenolone.

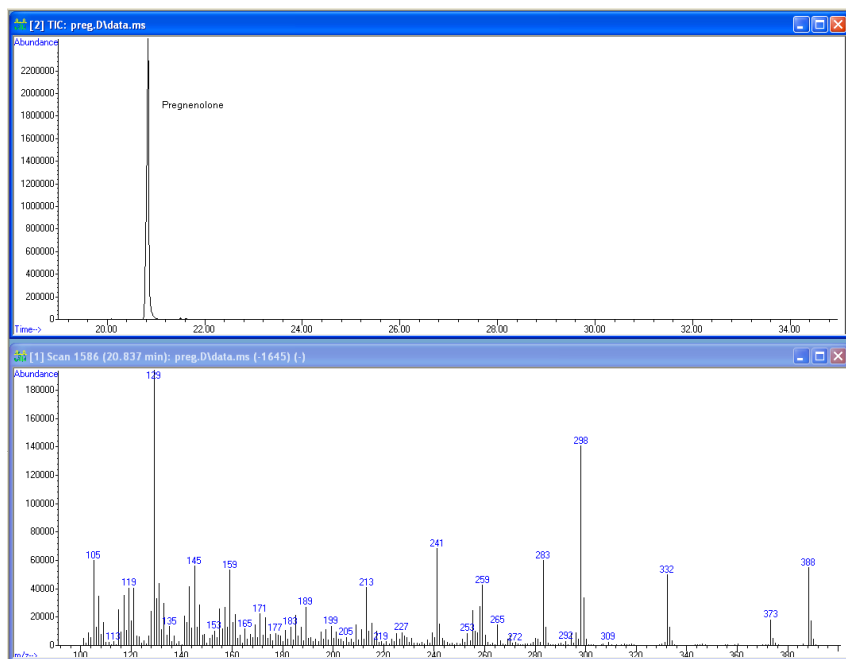

**CYP11A1 and 20 $\alpha$ -Hydroperoxycholesterol (2).** Extraction of the incubation mixture with MeCl<sub>2</sub> followed by TLC analysis showed that the 20 $\alpha$ -hydroperoxide **2** was transformed to a single glycol product. The metabolite was identified as 20 $\alpha$ ,22R-dihydroxycholesterol (**7**) ( $R_f$  = 0.3 rel. to cholesterol, purple colour response to acid/heat). TMS derivatization and comparison of GC-MS data with those of a synthetic reference sample showed identical GC mobility and MS fragmentation pattern, confirming the assigned structure.

*20 $\alpha$ ,22R*-dihydroxycholesterol (**7**)

**Figure S6.** GC-MS analysis of CYP11A1 and 20 $\alpha$ -hydroperoxycholesterol (**2**) incubation mixture showing the TMS derivative of metabolite 20 $\alpha$ ,22R-dihydroxycholesterol (**7**) as single product at  $t_R$  = 29.261 min. Excess **2** decomposes to the 3-TMS pregnenolone at  $t_R$  = 20.722 min with MS fragmentation pattern identical to authentic pregnenolone.

*Top panel:* GC of TMS derivatives of persilylated metabolite mixture showing 20 $\alpha$ ,22R-dihydroxycholesterol (**7**) at  $t_R$  = 29.261 min and pregnenolone at  $t_R$  = 20.722 min (decomposition product of excess **2**). *Lower panel:* MS of 3-TMS-pregnenolone at  $t_R$  = 20.722 min (decomposition product of excess **2**), identical to authentic 3-TMS-pregnenolone.

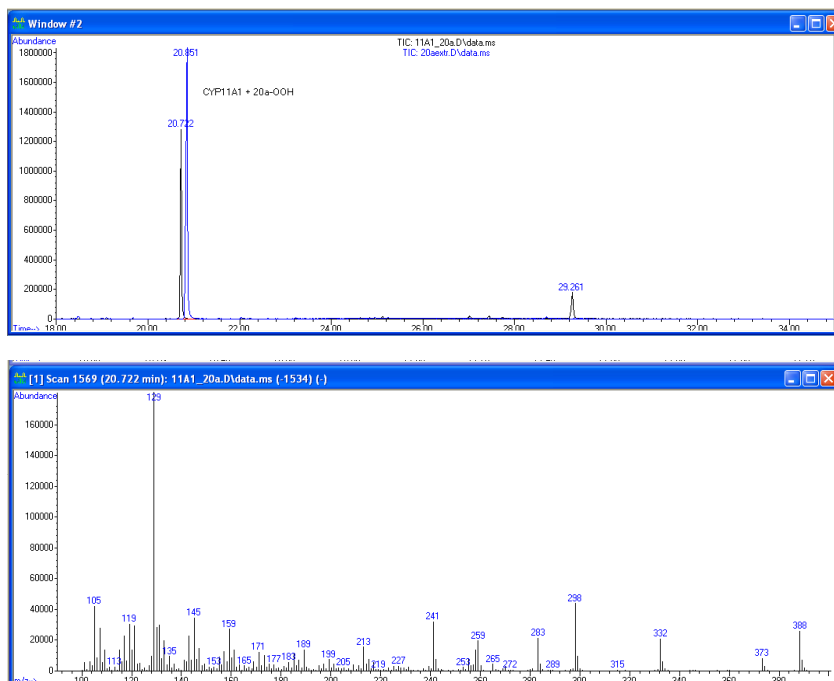

**Figure S8.** *Top panel:* GC of TMS derivative of metabolite at  $t_R = 29.26$  min, identified as  $20\alpha,22R$ -dihydroxycholesterol (**7**). *Lower panel:* MS fragmentation pattern identical to that of authentic **7** (Figure S9): MS =  $m/z$  389 (loss of C22-27 and 20-TMS),  $m/z$  299 (loss of C22-27 and 22-OTMS and 3-TMS),  $m/z$  173 (base peak, fragment C22-27 + 22-OTMS produced upon cleavage of the C20-22 bond).

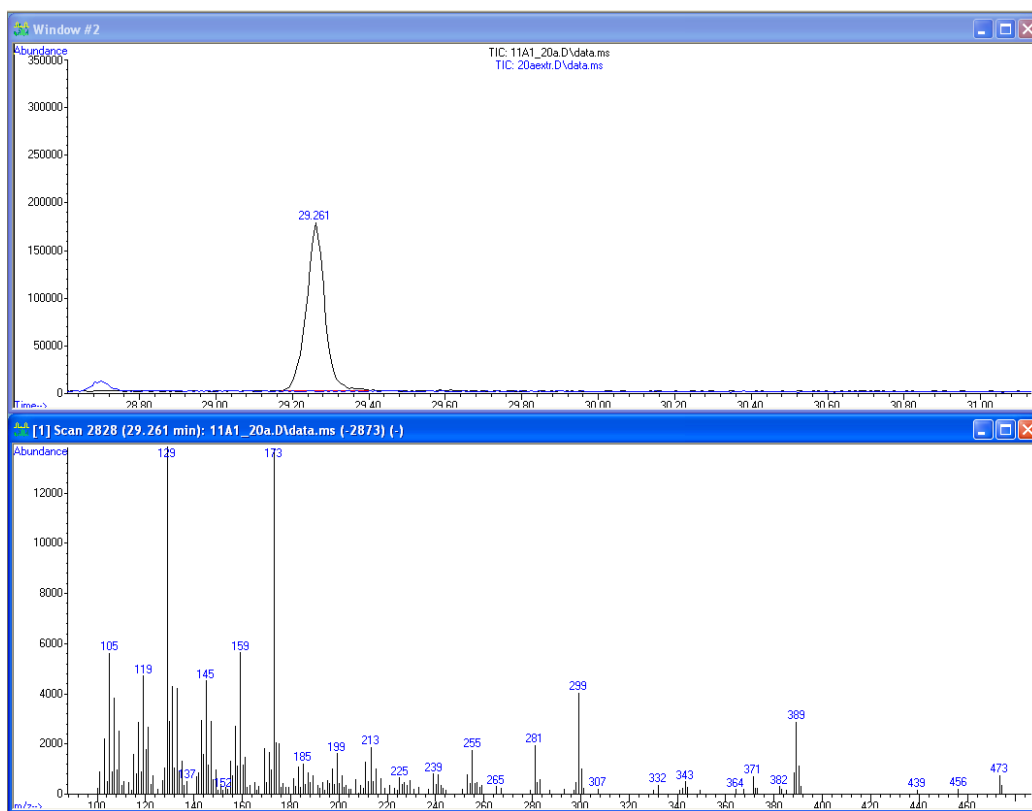

**Figure S9.** MS of authentic  $20\alpha,22R$ -dihydroxycholesterol (**7**).

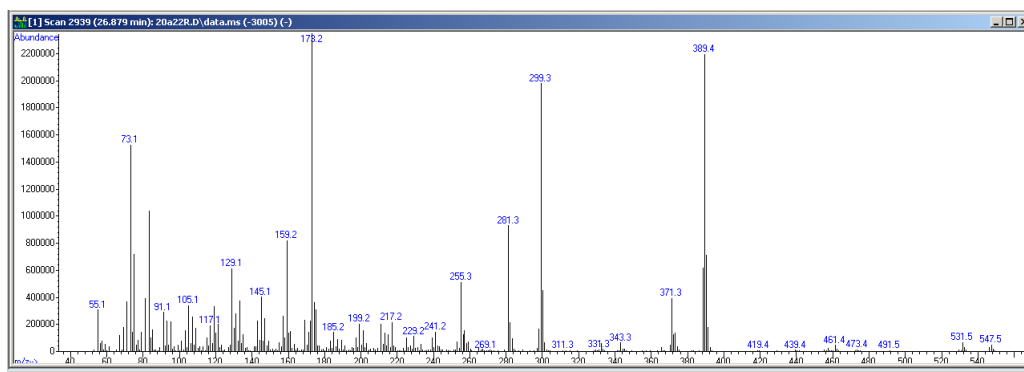

*CYP11A1* and 20 $\beta$ -hydroperoxy-20-iso-cholesterol (**3**). Extraction of the incubation mixture with MeCl<sub>2</sub> followed by TLC analysis showed that **3** was transformed to a single glycol product. The metabolite was identified as the 20 $\beta$ ,21-dihydroxy-20-iso-cholesterol (**8**) ( $R_f$  = 0.2 rel. to cholesterol, purple colour response to acid/heat) (Scheme 1). TMS derivatization and comparison of GC-MS data with those of a synthetic reference sample showed identical GC mobilities and MS fragmentation pattern, confirming the assigned structures (Figure S9).

**Figure S9.** GC-MS analysis of CYP11A1 and 20 $\beta$ -hydroperoxy-20-iso-cholesterol (**3**) incubation mixture showing the TMS derivative of metabolite 20 $\beta$ ,21-dihydroxy-20-iso-cholesterol (**8**) as single product at  $t_R$  = 29.80 min. Excess **3** decomposes to 3-TMS pregnenolone at  $t_R$  = 20.722 min with MS fragmentation pattern identical to authentic pregnenolone. *Top panel:* GC of TMS derivatives of CYP11A1 and **3** metabolites. Peak at  $t_R$  = 20.722 min is pregnenolone (decomposition product of excess **3**), and the peak at  $t_R$  = 29.803 min is identified as 20 $\beta$ ,21-dihydroxy-20-iso-cholesterol (**8**). *Middle panel:* MS of peak at  $t_R$  = 20.722 min, identical to pregnenolone. *Lower panel:* MS of peak at  $t_R$  = 29.803 min, identical to authentic 20 $\beta$ ,21-dihydroxy-20-iso-cholesterol (**8**) (Figure S10). Characteristic ions at ,  $m/z$  544 (M - 20-OTMS), 459 (M - C22-27 and 20-OTMS), 255, 129 (base peak).

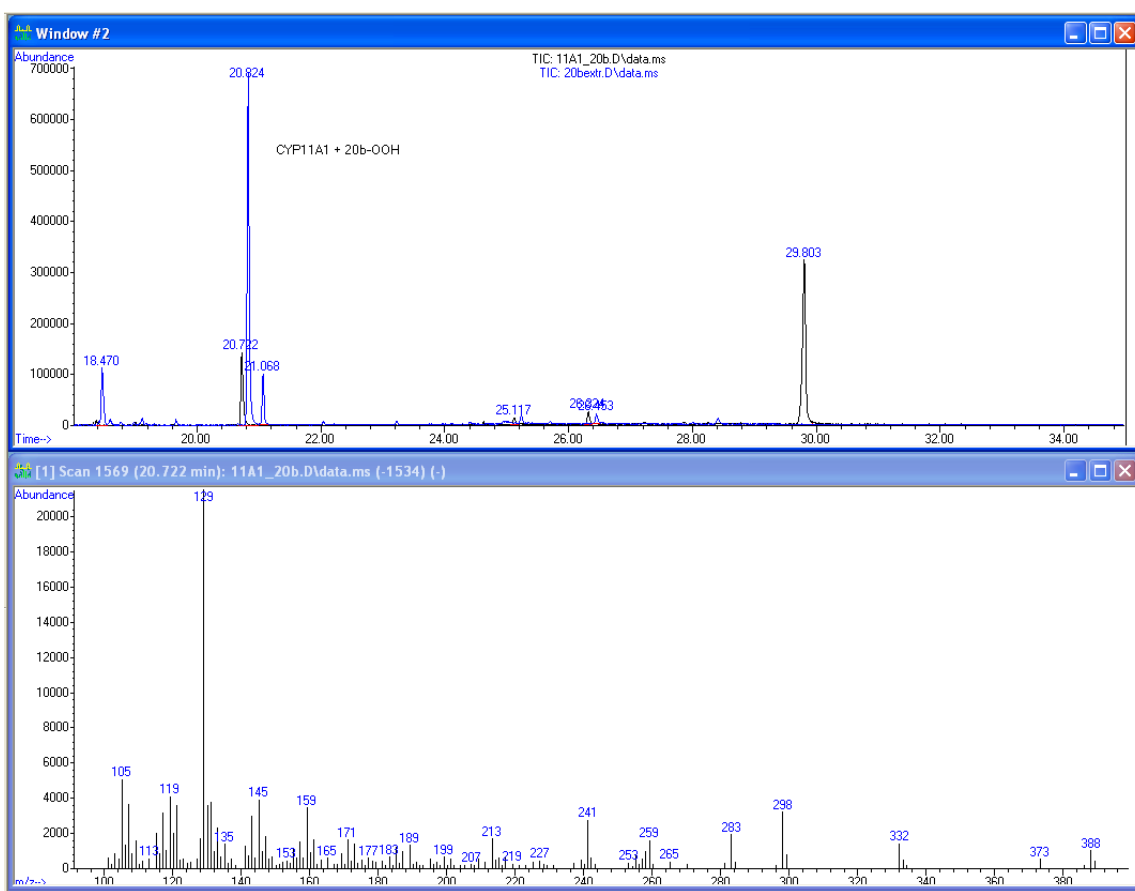

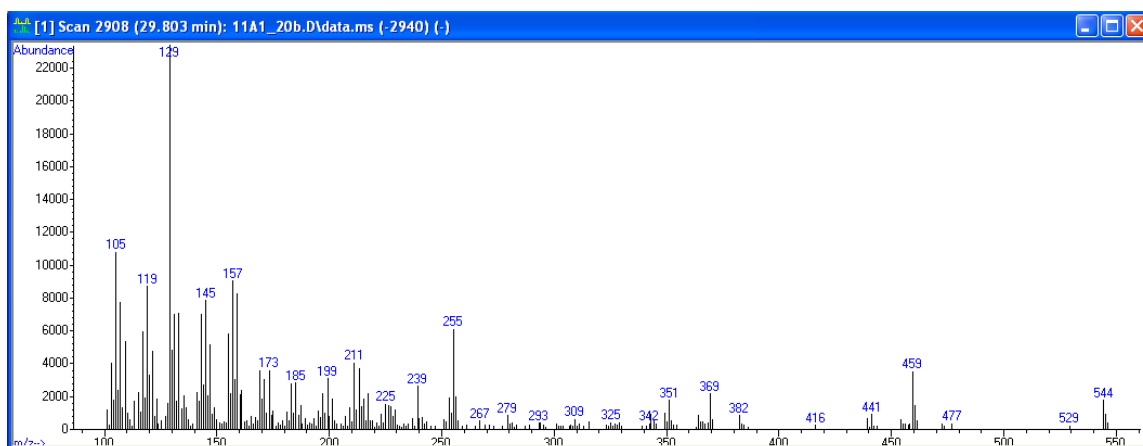

**Figure S10.** GC-MS of authentic 20 $\beta$ ,21-dihydroxy-20-*iso*-cholesterol (8).

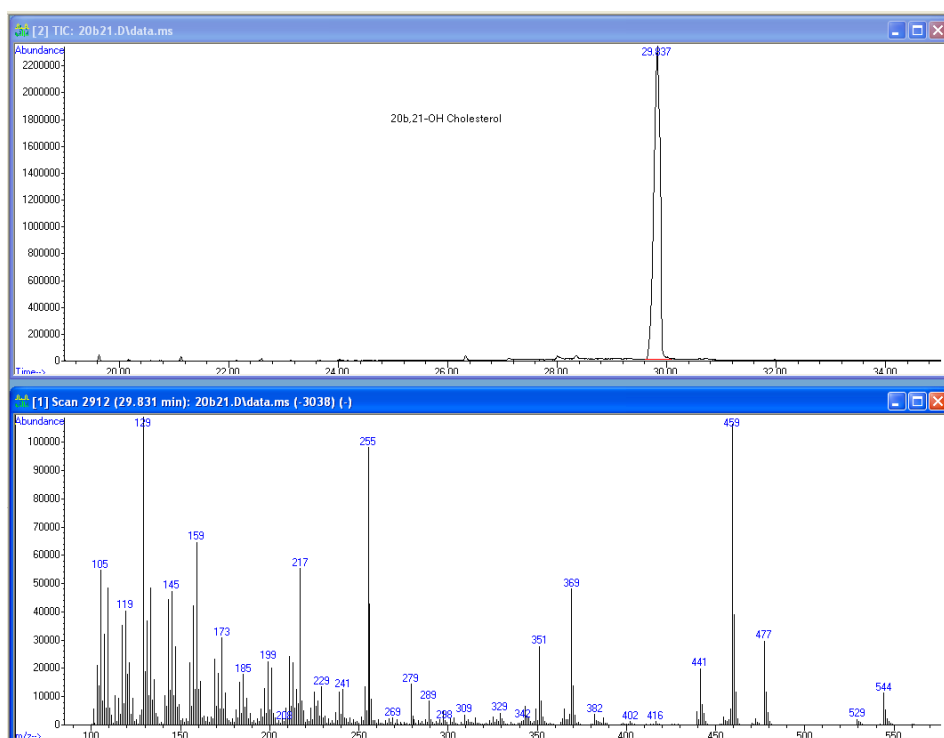

*Spectral changes in CYP7A1 and CYP46A1 and product analysis*

Addition of the 25-hydroperoxide **1** and 20 $\xi$ -hydroperoxides **2** and **3** to CYP7A1 introduced significant light scattering in the P450 difference spectra as indicated by a lack of well-defined peaks or troughs. Yet there was no visible protein precipitation in the cuvette, which could be a reason for increased solution light scattering. Light scattering was the smallest upon the addition of 25-hydroperoxide **1** and produced difference spectrum with a maximum at 384 nm and a minimum at 426 nm, parameters close to those of type 1 spectral response (maximum at 380-390 nm and minimum at 415-420 nm). Light scattering was also observed in the incubation of 20 $\xi$ -hydroperoxides **2** and **3** with CYP46A1 but was not visible upon the addition of 25-hydroperoxide **1** (Figure S11). In all cases no major reaction products were observed by TLC and GC-MS analyses.

**Figure S11.** Difference spectra developed within 1-10 min after addition of 25-hydroperoxycholesterol (**1**), 20 $\alpha$ -hydroperoxycholesterol (**2**) or 20 $\beta$ -hydroperoxy-20-*iso*-cholesterol (**3**) to CYP7A1 and CYP46A1. A) CYP7A1 and **1**, B) CYP7A1 and **2**, C) CYP7A1 and **3**, D) CYP46A1 and **1**, E) CYP46A1 and **2**, F) CYP46A1 and **3**.

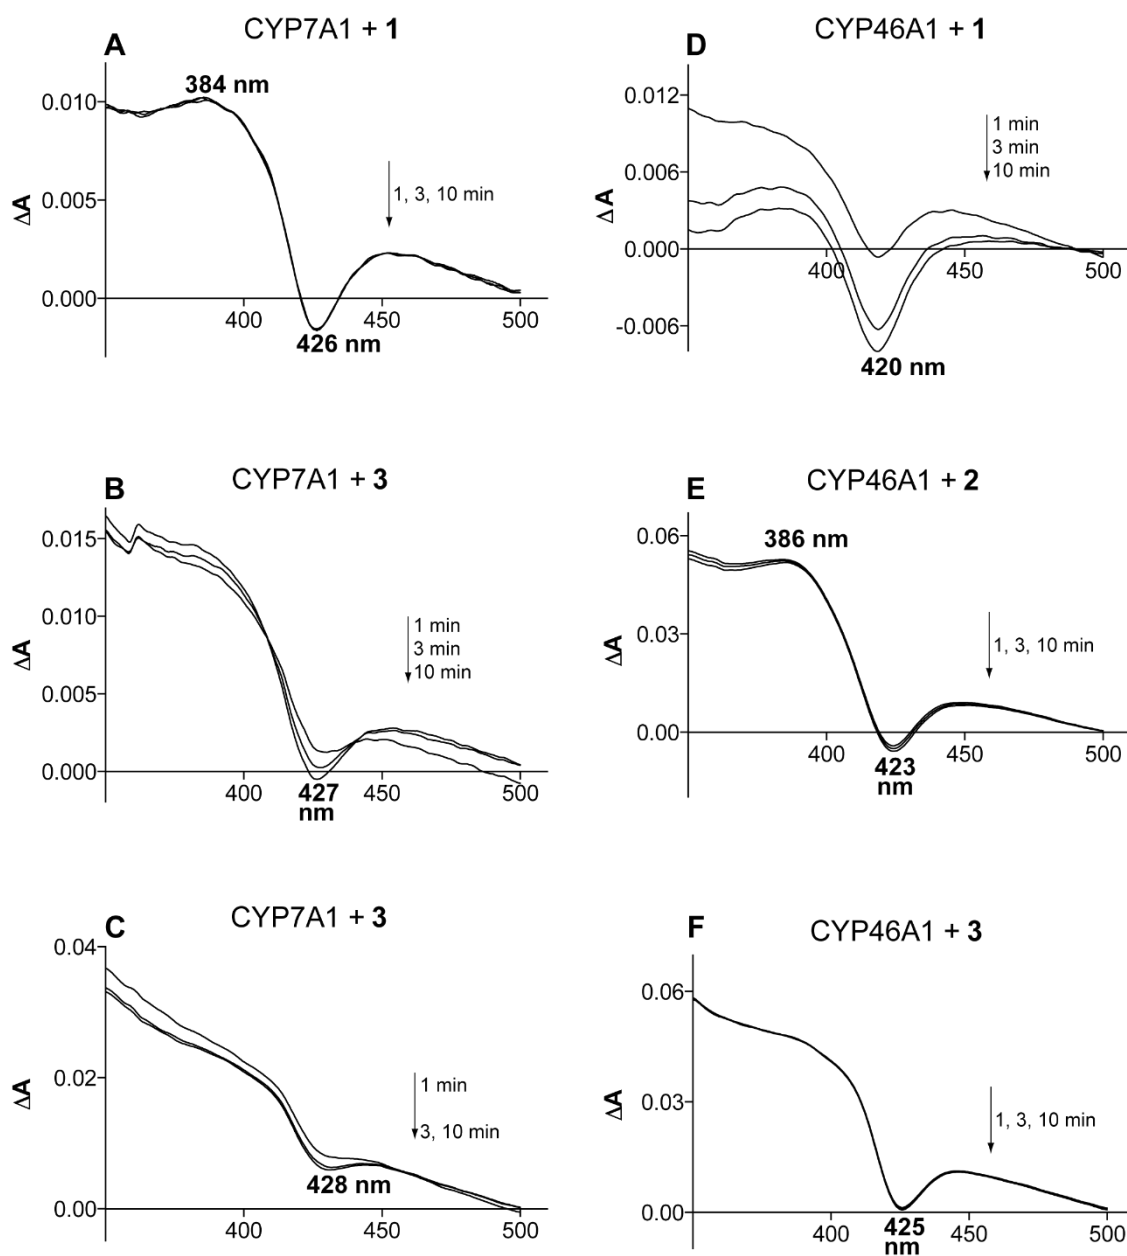

The *20 $\alpha$ -hydroperoxycholesterol* (**2**) and its *20 $\beta$ -hydroperoxy-20-iso-cholesterol* (**3**) were isolated from air-aged cholesterol [12a] and characterized upon borohydride reduction to the known *20 $\beta$ -hydroxy-20-iso-cholesterol* and *20 $\alpha$ -hydroxycholesterol*, which were in all respects identical to the authentic *20-hydroxysterols* [15d]. Incubation of CYP11A1 with the *20 $\alpha$ -hydroperoxide* **2** gave the known *20 $\alpha$ ,22R-dihydroxycholesterol* (**7**) while the metabolite of the *20 $\beta$ -hydroperoxide* **3** was identified as the *20 $\beta$ ,21-dihydroxy-20-iso-cholesterol* (**8**) by comparison of its chromatographis and mass spectral properties with those of a synthetic sample [15d].

The *epimeric 20 $\alpha$ ,21-dihydroxycholesterol* and *20 $\beta$ ,21-dihydroxy-20-iso-cholesterol* (**8**) were prepared from *21-hydroxypregnenolone* and addition of the side chain via a Grignard reaction. The assigned configurations were previously established by converting the epimeric glycols to the *3,21-dibenzoates* and transformation to the known *20 $\alpha$ -* and *20 $\beta$ -hydroxysterols* [15a]. X-ray crystallography of the *20 $\alpha$ ,21-dihydroxycholesterol* isomer confirmed the assigned configuration.

**Figure S12**

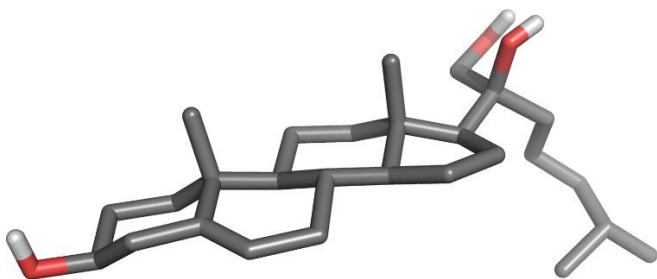

X-ray crystallography of *20 $\alpha$ ,21-dihydroxycholesterol*
